# Supplementary material for: Lutein Has a Positive Impact on Brain Health in Healthy Older Adults: A Systematic Review of Randomized Controlled Trials and Cohort Studies
Source: MDPI journal article supplement (doi:10.3390/nu13061746), 2021-05-21
Supplement: s1 [file s1]

Table S3. The brain coordinates.

| Lead author; year | Target relationships                                                    | Region                         | Voxels | <i>p</i> | <i>x</i> | <i>y</i> | <i>z</i> | Extent | <i>T</i> | <i>Z</i> | Effect Size ( <i>r</i> ) |
|-------------------|-------------------------------------------------------------------------|--------------------------------|--------|----------|----------|----------|----------|--------|----------|----------|--------------------------|
| Mewborn ; 2018a   | Relation of MPOD and Serum L & Z to ROI diffusivity                     | FA—Serum                       |        |          |          |          |          |        |          |          |                          |
|                   |                                                                         | L Cingulum                     | 8      | .019     | -7       | 11       | 27       |        | 3.79     |          | .465                     |
|                   |                                                                         | RD—Serum                       |        |          |          |          |          |        |          |          |                          |
|                   |                                                                         | L Cingulum                     | 7      | .033     | -6       | 9        | 29       |        | 3.29     |          | .415                     |
|                   |                                                                         | L Cingulum                     | 2      | .041     | -7       | 13       | 26       |        | 3.12     |          | .397                     |
|                   | Relation of MPOD and Serum L & Z to exploratory whole-brain diffusivity | AD—MPOD                        |        |          |          |          |          |        |          |          |                          |
|                   |                                                                         | L Uncinate fasciculus          | 4      | .040     | -36      | -1       | -16      |        | 3.53     |          | .439                     |
|                   |                                                                         | FA—MPOD                        |        |          |          |          |          |        |          |          |                          |
|                   |                                                                         | R Genu of the corpus callosum  | 1      | .002     | 14       | 25       | -7       |        | 3.22     |          | .408                     |
|                   |                                                                         | L Fornix                       | 1      | .010     | -24      | -30      | 2        |        | 2.62     |          | .342                     |
|                   |                                                                         | R Posterior corona radiata     | 1      | .001     | 25       | -36      | 25       |        | 3.55     |          | .442                     |
|                   |                                                                         | FA—Serum                       |        |          |          |          |          |        |          |          |                          |
|                   |                                                                         | L Posterior corona radiata     | 4      | .003     | -27      | -62      | 20       |        | 3.02     |          | .385                     |
|                   |                                                                         | L Superior corona radiata      | 1      | .001     | -28      | -14      | 34       |        | 4.00     |          | .485                     |
|                   |                                                                         | RD—MPOD                        |        |          |          |          |          |        |          |          |                          |
|                   |                                                                         | L Cingulum (hippocampus)       | 5      | .008     | -24      | -22      | -22      |        | 2.89     |          | .372                     |
|                   |                                                                         | R Genu of the corpus callosum  | 1      | .004     | 14       | 25       | -7       |        | 2.84     |          | .366                     |
|                   |                                                                         | R Posterior corona radiata     | 1      | .009     | 25       | -35      | 36       |        | 2.43     |          | .319                     |
|                   |                                                                         | R Superior corona radiata      | 1      | .008     | 22       | 2        | 31       |        | 2.44     |          | .321                     |
|                   |                                                                         | RD—Serum                       |        |          |          |          |          |        |          |          |                          |
|                   |                                                                         | R Posterior thalamic radiation | 1      | .010     | 38       | -54      | 0        |        | 2.31     |          | .305                     |
|                   |                                                                         | L Superior corona radiata      | 1      | .002     | -28      | -14      | 34       |        | 3.33     |          | .419                     |
|                   |                                                                         | AD—MPOD                        |        |          |          |          |          |        |          |          |                          |
|                   |                                                                         | L Uncinate fasciculus          | 8      | .001     | -36      | -1       | -16      |        | 3.53     |          | .440                     |
|                   |                                                                         | L Uncinate fasciculus          | 1      | .006     | -35      | -1       | -21      |        | 2.64     |          | .345                     |
|                   |                                                                         | L Uncinate fasciculus          | 1      | .009     | -37      | -4       | -17      |        | 1.95     |          | .261                     |

|                    |                          |  |                                        |   |      |     |     |     |     |      |      |
|--------------------|--------------------------|--|----------------------------------------|---|------|-----|-----|-----|-----|------|------|
|                    |                          |  | AD—Serum                               |   |      |     |     |     |     |      |      |
|                    |                          |  | L Cingulum<br>(hippocampus)            | 3 | .009 | −24 | −17 | −26 |     | 2.50 | .328 |
|                    |                          |  | L Cingulum<br>(hippocampus)            | 1 | .008 | −26 | −19 | −25 |     | 2.96 | .380 |
|                    |                          |  | R Uncinate fasciculus                  | 1 | .003 | 32  | 0   | −20 |     | 3.12 | .397 |
|                    |                          |  | L Corticospinal tract                  | 2 | .008 | −5  | −19 | −22 |     | 2.10 | .280 |
|                    |                          |  |                                        |   |      |     |     |     |     |      |      |
|                    |                          |  | R superior lateral<br>occipital cortex |   |      | 54  | −70 | 16  | 19  | 3.08 | .403 |
|                    |                          |  |                                        |   |      | 56  | −66 | 16  | *   | 2.90 | .383 |
|                    |                          |  | R inferior lateral<br>occipital cortex |   |      | 56  | −68 | 12  | *   | 2.94 | .387 |
|                    | Relationshi<br>p between |  | R middle frontal gyrus                 |   |      | 48  | 18  | 30  | 59  | 3.03 | .397 |
|                    | MPOD and                 |  | R frontal pole                         |   |      | 0   | 60  | 16  | 31  | 2.93 | .386 |
|                    | brain                    |  | L cingulate gyrus                      |   |      | −2  | 4   | 24  | 30  | 2.85 | .377 |
|                    | activation               |  | R cingulate gyrus                      |   |      | 4   | 2   | 30  | *   | 2.56 | .343 |
|                    |                          |  | R angular gyrus                        |   |      | 60  | −50 | 38  | 15  | 2.84 | .376 |
|                    |                          |  |                                        |   |      | 62  | −50 | 34  | *   | 2.81 | .373 |
|                    |                          |  | R precentral gyrus                     |   |      | 62  | 12  | 8   | 9   | 2.82 | .374 |
|                    |                          |  | R superior frontal gyrus               |   |      | 6   | 56  | 25  | 10  | 2.62 | .351 |
|                    |                          |  |                                        |   |      |     |     |     |     |      |      |
|                    |                          |  | R precentral gyrus                     |   |      | 16  | −18 | 48  | 62  | 3.75 | .492 |
|                    |                          |  | L middle temporal gyrus                |   |      | −56 | −8  | −12 | 51  | 3.55 | .472 |
| Mewborn<br>; 2018b |                          |  | L superior parietal<br>lobule          |   |      | −36 | −42 | 50  | 199 | 3.46 | .462 |
|                    |                          |  |                                        |   |      | −28 | −56 | 58  | *   | 3.29 | .444 |
|                    |                          |  | L superior lateral<br>occipital cortex |   |      | −20 | −74 | 40  | 61  | 3.42 | .458 |
|                    |                          |  |                                        |   |      | −16 | −88 | 36  | 12  | 2.73 | .381 |
|                    | Relationshi<br>p between |  | R temporal fusiform<br>cortex          |   |      | 36  | −30 | −16 | 33  | 3.36 | .452 |
|                    | Serum L &<br>Z and brain |  | L precentral gyrus                     |   |      | −20 | −40 | 44  | 68  | 3.32 | .448 |
|                    | activation               |  | R superior lateral<br>occipital cortex |   |      | 26  | −84 | 30  | 67  | 3.21 | .436 |
|                    |                          |  |                                        |   |      | 24  | −62 | 56  | 51  | 3.04 | .417 |
|                    |                          |  | L superior frontal gyrus               |   |      | −22 | 30  | 54  | 28  | 3.16 | .430 |
|                    |                          |  | L posterior superior<br>temporal gyrus |   |      | −60 | −32 | 4   | 49  | 2.92 | .403 |
|                    |                          |  | L planum temporale                     |   |      | −62 | −22 | 6   | *   | 2.70 | .377 |
|                    |                          |  | L superior temporal<br>gyrus           |   |      | −52 | −38 | 2   | *   | 2.56 | .360 |

|                     |                                                                                    |                                        |     |      |     |    |      |      |
|---------------------|------------------------------------------------------------------------------------|----------------------------------------|-----|------|-----|----|------|------|
| Lindberg<br>h; 2017 | Relationshi<br>p of Serum<br>L & Z to<br>brain<br>activation<br>during<br>encoding | L occipital pole                       | -28 | -96  | 6   | 9  | 2.99 | .411 |
|                     |                                                                                    | L temporal fusiform<br>cortex          | 44  | -16  | -16 | 9  | 2.95 | .406 |
|                     |                                                                                    | R thalamus                             | 24  | -22  | 4   | 36 | 2.93 | .404 |
|                     |                                                                                    | L planum polare                        | -36 | -8   | -10 | 19 | 2.87 | .397 |
|                     |                                                                                    | R posterior<br>supramarginal gyrus     | 46  | -38  | 10  | 21 | 2.58 | .362 |
|                     |                                                                                    | R posterior superior<br>temporal gyrus | 54  | -36  | 8   | *  | 2.87 | .397 |
|                     |                                                                                    | L Heschl's gyrus                       | -46 | -22  | 2   | 12 | 2.83 | .392 |
|                     |                                                                                    | L parahippocampal<br>gyrus             | -32 | -36  | -18 | 22 | 2.83 | .392 |
|                     |                                                                                    | R postcentral gyrus                    | 6   | -40  | 62  | 22 | 2.66 | .372 |
|                     |                                                                                    | L central opercular<br>cortex          | -48 | 6    | 2   | 11 | 2.75 | .383 |
|                     |                                                                                    | R anterior middle<br>temporal gyrus    | 58  | -2   | -22 | 19 | 2.70 | .377 |
|                     |                                                                                    | R anterior superior<br>temporal gyrus  | 50  | -2   | -16 | *  | 2.62 | .367 |
|                     |                                                                                    | L temporal pole                        | -52 | 6    | -18 | 10 | 2.67 | .373 |
|                     |                                                                                    | R lingual gyrus                        | 18  | -60  | -16 | 8  | 2.61 | .366 |
|                     |                                                                                    | MPOD                                   |     |      |     |    |      |      |
|                     |                                                                                    | L insular cortex                       | -40 | 10   | -14 | 99 | 3.03 | .45  |
|                     |                                                                                    | L insular cortex                       | -42 | 0    | -14 | *  | 2.94 | .44  |
|                     |                                                                                    | R middle temporal<br>gyrus             | 62  | -58  | -10 | 10 | 2.75 | .41  |
|                     |                                                                                    | L cerebellum                           | -10 | -76  | 2   | 11 | 2.52 | .38  |
|                     |                                                                                    | L supramarginal gyrus                  | -64 | -34  | -22 | 3  | 2.44 | .37  |
|                     |                                                                                    | Serum                                  |     |      |     | 26 |      |      |
|                     |                                                                                    | L lateral occipital cortex             | -24 | -74  | 38  | 45 | 2.96 | .44  |
|                     |                                                                                    | L postcentral gyrus                    | -20 | -44  | 66  | 31 | 2.90 | .43  |
|                     |                                                                                    | L parietal operculum<br>cortex         | -48 | -30  | 24  | 39 | 2.90 | .43  |
|                     |                                                                                    | L precentral gyrus                     | -58 | 0    | 32  | 5  | 2.76 | .41  |
|                     |                                                                                    | R lateral occipital cortex             | 36  | -68  | 50  | 17 | 2.60 | .39  |
|                     |                                                                                    | R lateral occipital cortex             | 26  | -78  | 28  | 7  | 2.48 | .37  |
|                     | Relationshi<br>p of Serum<br>L & Z to<br>brain                                     | MPOD                                   |     |      |     |    |      |      |
|                     |                                                                                    | L inferior frontal gyrus               | -42 | 8    | 24  | 48 | 3.10 | .46  |
|                     |                                                                                    | L cerebellum                           | -10 | -74  | -22 | 24 | 2.96 | .44  |
|                     |                                                                                    | L occipital pole                       | -12 | -102 | -2  | 9  | 2.78 | .41  |

|            |                            |     |     |     |    |      |     |
|------------|----------------------------|-----|-----|-----|----|------|-----|
| activation | L planum polrare           | -46 | -4  | -6  | 8  | 2.56 | .38 |
| during     | L insular cortex           | -38 | -4  | -12 | 15 | 2.53 | .38 |
| recall     | R middle frontal gyrus     | 46  | 34  | 18  | 7  | 2.47 | .37 |
|            | R occipital pole           | 16  | -96 | 12  | 2  | 2.40 | .36 |
|            | Serum                      |     |     |     |    |      |     |
|            | L central opercular cortex | -48 | -4  | 10  | 21 | 3.36 | .49 |
|            | R lateral occipital cortex | 22  | -68 | 58  | 9  | 2.56 | .38 |
|            | L central opercular cortex | -58 | 2   | 2   | 7  | 2.48 | .37 |
|            | L superior parietal lobule | -38 | -42 | 60  | 4  | 2.45 | .37 |

---

FA: fractional anisotropy. RD: radial diffusivity. AD: axial diffusivity. R: right. L: left. ROI: region of interest. Serum L: lutein. Z: zeaxanthin. MPOD: macular pigment optical density. \*cluster overlaps with the preceding row.
