# Supplementary material for: Lutein Has a Positive Impact on Brain Health in Healthy Older Adults: A Systematic Review of Randomized Controlled Trials and Cohort Studies
Source: MDPI journal article supplement (doi:10.3390/nu13061746), 2021-05-21
Supplement: s1 [file s1]

**Table S4.** Quality assessment scores of intervention studies included in the list.

| Lead author;<br>year | Q1 | Q2 | Q3 | Q4 | Q5 | Q6 | Q7 | Q8 | Q9 | Q10 | Q11 | Q12 |
|----------------------|----|----|----|----|----|----|----|----|----|-----|-----|-----|
| Lindbergh;<br>2018   | Y  | Y  | ?  | Y  | Y  | Y  | Y  | ?  | Y  | N   | Y   | Y   |
| Lindbergh;<br>2020   | Y  | Y  | Y  | Y  | Y  | Y  | Y  | ?  | Y  | N   | Y   | Y   |
| Mewborn;<br>2019     | Y  | Y  | ?  | Y  | Y  | Y  | Y  | ?  | Y  | N   | Y   | Y   |
| Ceravolo;<br>2019    | Y  | Y  | Y  | Y  | ?  | ?  | Y  | ?  | ?  | Y   | Y   | ?   |

Q1: Random allocation. Q2: Concealed allocation. Q3: Similar baselines among the groups. Q4: Eligibility specified. Q5: Blinded assessor outcomes. Q6: Blinded care provider. Q7: Blinded patient. Q8: Intention-to-treat analysis. Q9: Details of allocation method. Q10: Adequate descriptions of each group. Q11: Statistical comparison between groups. Q12: Dropout report. Y: Yes, the study met the criteria for the question. N: No; the study did not meet the criteria for the question. ?: No information or study was the case with the question.
